# Supplementary material for: Dissociation of Inositol-requiring Enzyme (IRE1α)-mediated c-Jun N-terminal Kinase Activation from Hepatic Insulin Resistance in Conditional X-box-binding Protein-1 (XBP1) Knock-out Mice
Source: PubMed Central journal article supplement — J Biol Chem. 2011 Nov 28;287(4):2558–67. doi: 10.1074/jbc.M111.316760 (PMC3268415; doi:10.1074/jbc.m111.316760), 2011-11-28
Supplement: supp_M111.316760_Supplemental_data.pdf [file supp_M111.316760_Supplemental_data.pdf]

# Supplemental figure 1

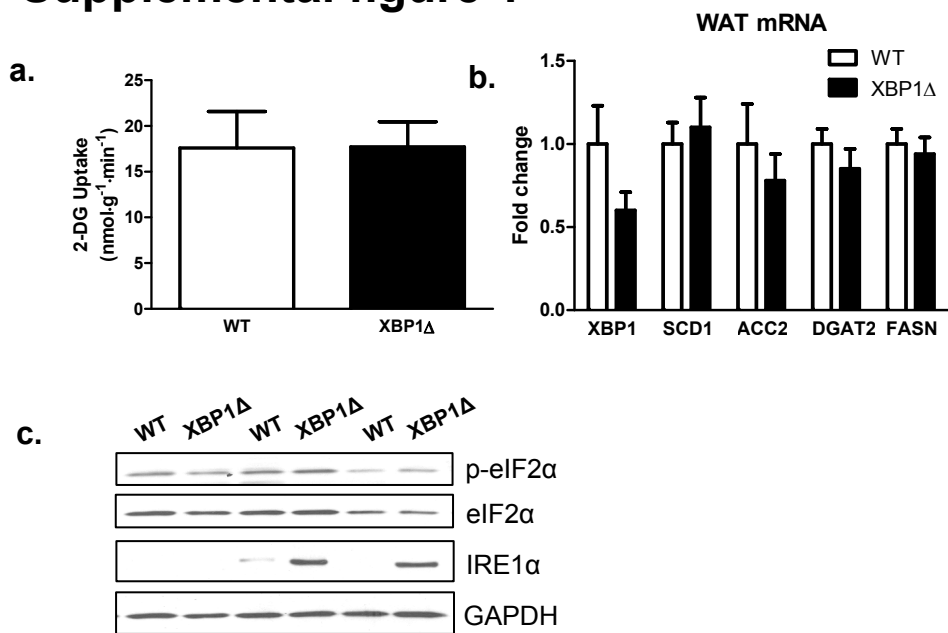

**Supplemental figure 1. Adipose tissue from XBP1Δ mice show no signs XBP1 deletion, ER stress or changes in insulin-stimulated glucose metabolism. (a)** Adipose-specific glucose uptake during hyperinsulinemic-euglycemic clamp. **(b)** Quantitative PCR of cDNA from white adipose for XBP1 and lipogenic genes. **(c)** Western blotting of white adipose for markers of ER stress. (n=6-9 for both genotypes for each panel). Blots shown are representative of 6-9 mice per genotype.
